# Supplementary material for: Reactive Oxygen Species Initiate Defence Responses of Potato Photosystem II to Sap-Sucking Insect Feeding
Source: MDPI journal article supplement (doi:10.3390/insects13050409), 2022-04-24
Supplement: s1 [file s1]

# Reactive Oxygen Species Initiate Defence Responses of Potato Photosystem II to Sap-Sucking Insect Feeding

Ilektra Sperdouli <sup>1</sup>, Stefanos Andreadis <sup>1</sup>, Ioannis-Dimosthenis S. Adamakis <sup>2,\*</sup>, Julietta Moustaka <sup>3,4</sup>, Eleni Koutsogeorgiou <sup>1</sup>, and Michael Moustakas <sup>3,\*</sup>

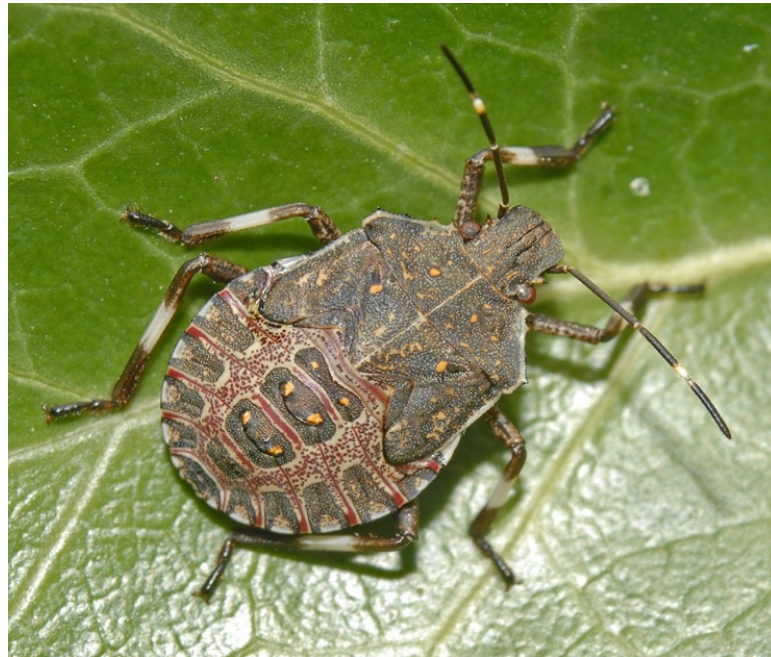

**Figure S1.** Dorsal view of fifth instar nymph of the brown marmorated stink bug (*Halyomorpha halys* Stål) an insect of the Pentatomidae family, feeding at the main vein (<https://antropocene.it/en/2019/11/01/halyomorpha-halys/>)

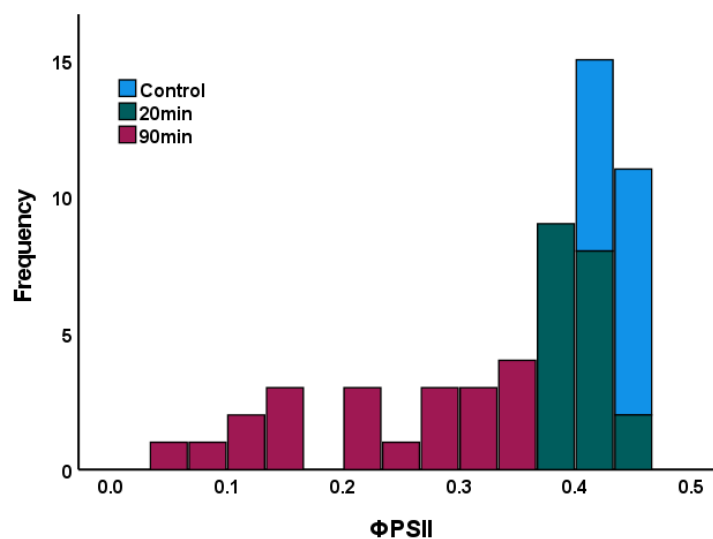

**Figure S2.** Histogram of all data points of the effective quantum yield of PSII photochemistry ( $\Phi_{PSII}$ ) per time point (data of Figure 1).

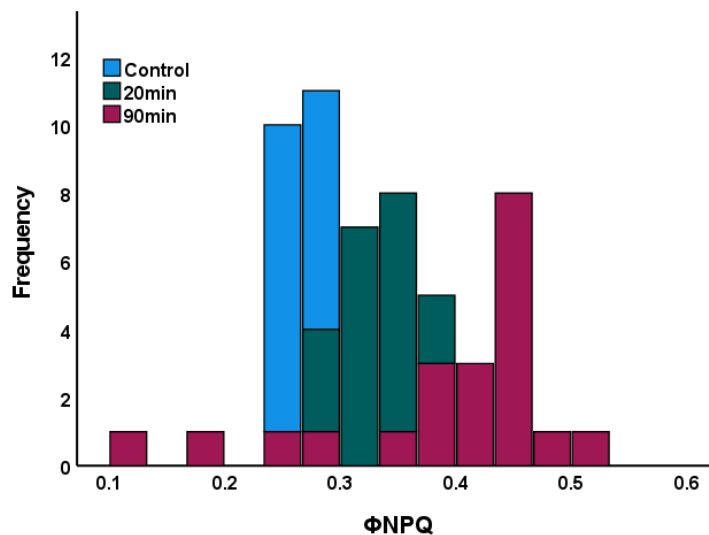

**Figure S3.** Histogram of all data points of the quantum yield of regulated non-photochemical energy loss ( $\Phi_{NPQ}$ ) per time point (data of Figure 1).

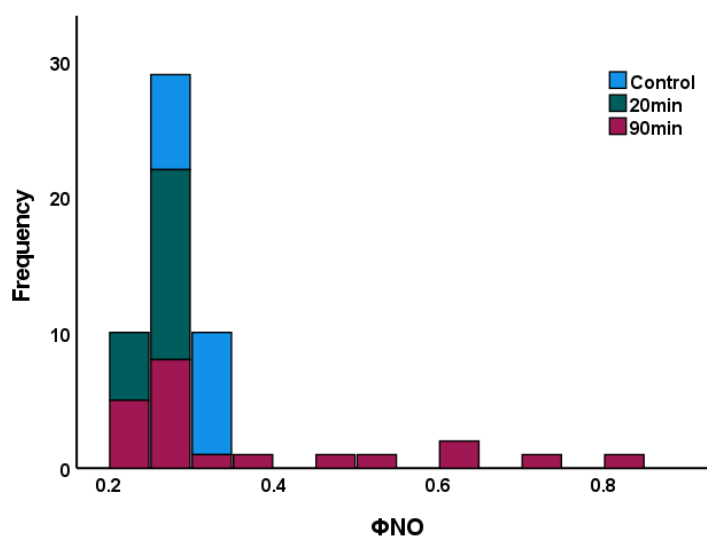

**Figure S4.** Histogram of all data points of the quantum yield of non-regulated energy ( $\Phi_{NO}$ ) per time point (data of Figure 1).

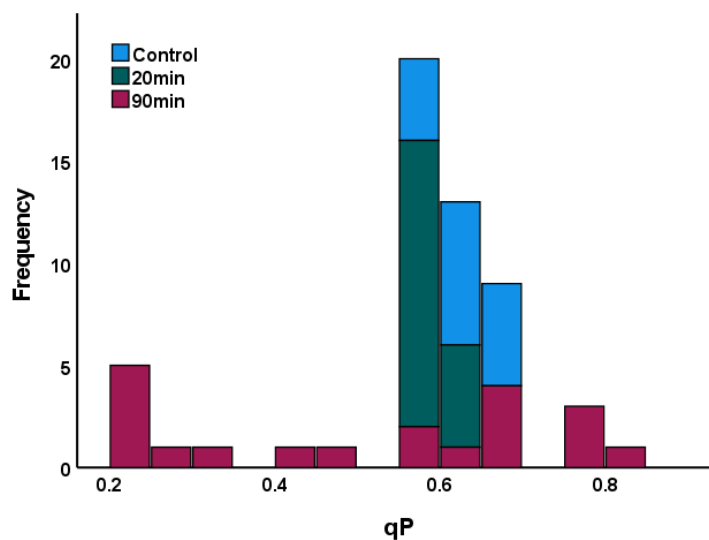

**Figure S5.** Histogram of all data points of the fraction of open PSII reaction centers ( $qP$ ) per time point (data of Figure 3a).

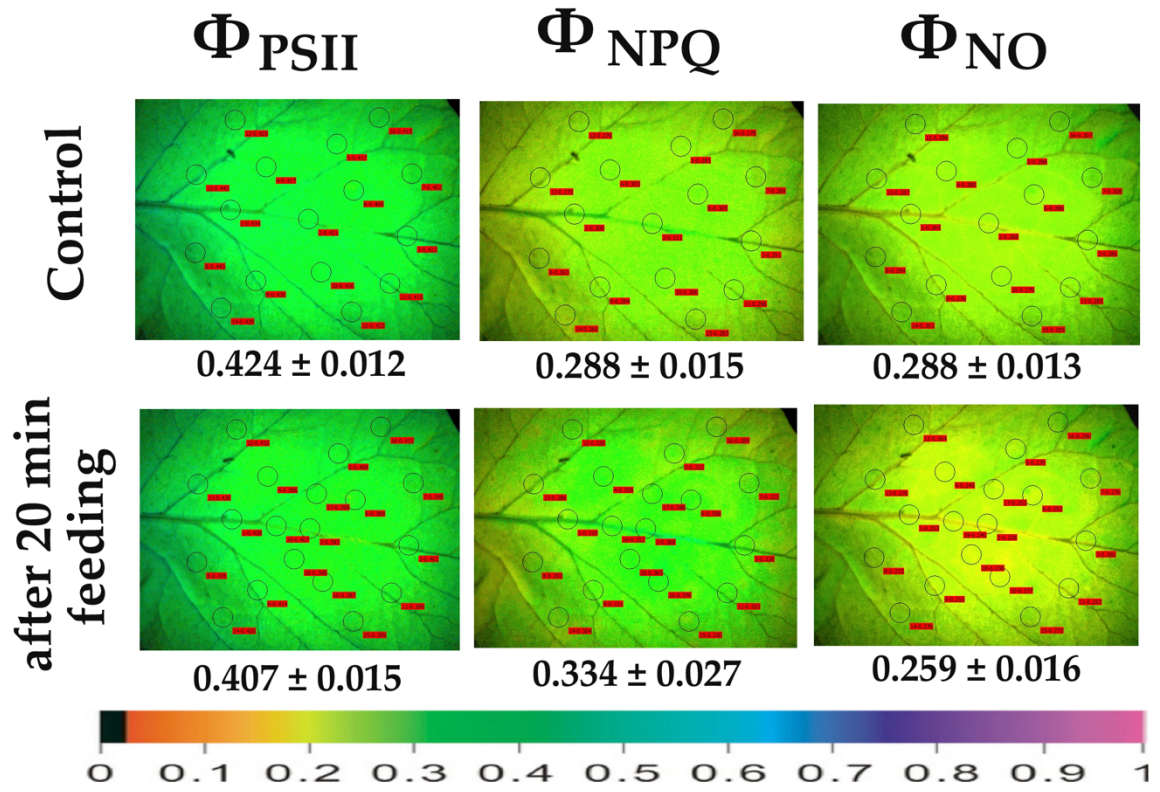

**Figure S6.** Typical color-coded images of the effective quantum yield of PSII photochemistry ( $\Phi_{PSII}$ ), the quantum yield of regulated non-photochemical energy loss ( $\Phi_{NPQ}$ ), and the quantum yield of non-regulated energy loss ( $\Phi_{NO}$ ), before insect feeding (control), and immediately after 20 min feeding by the sap-sucking insect *Halyomorpha halys*. The areas of interests (AOIs) are shown in circles with their associated measurements in red labels; the resultant values for the whole leaflet (average  $\pm$  SD) are given also. The color code at the bottom ranges from pixel values 0.0 to 1.0.
